# Supplementary material for: Leptin produced by obesity-altered adipose stem cells promotes metastasis but not tumorigenesis of triple-negative breast cancer in orthotopic xenograft and patient-derived xenograft models
Source: PubMed Central journal article supplement (PMC6530039; doi:10.1186/s13058-019-1153-9), 2019-05-22
Supplement: 13058_2019_1153_MOESM2_ESM.pdf [file 13058_2019_1153_MOESM2_ESM.pdf]

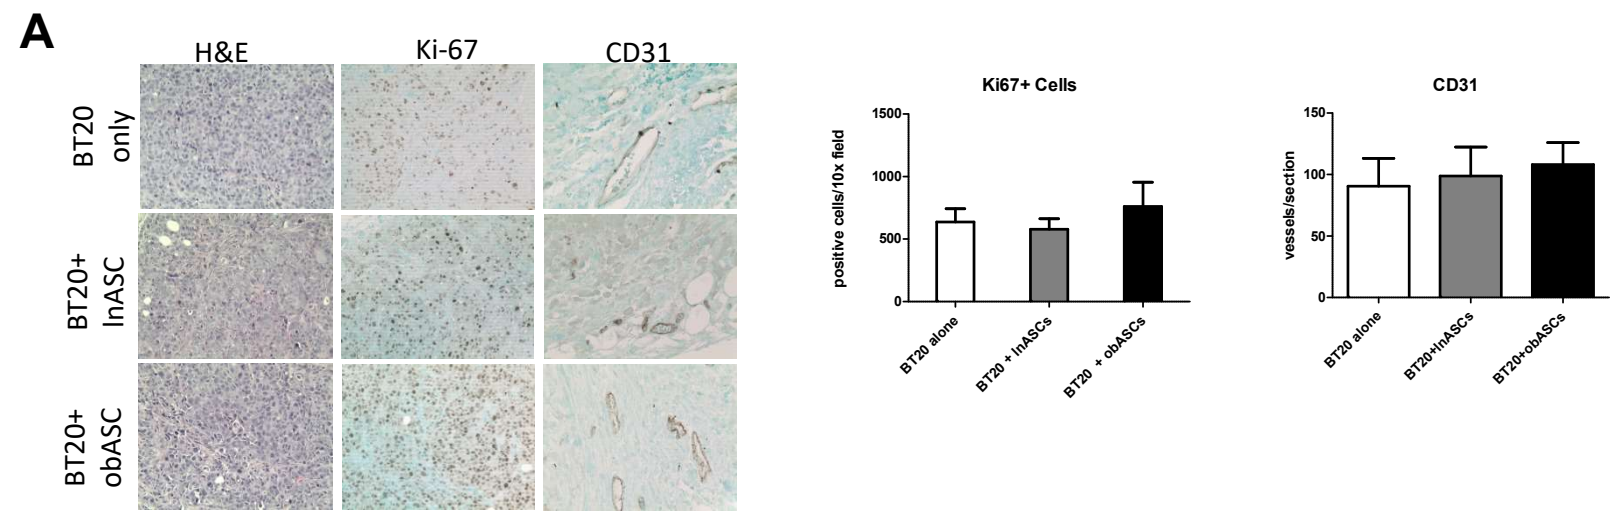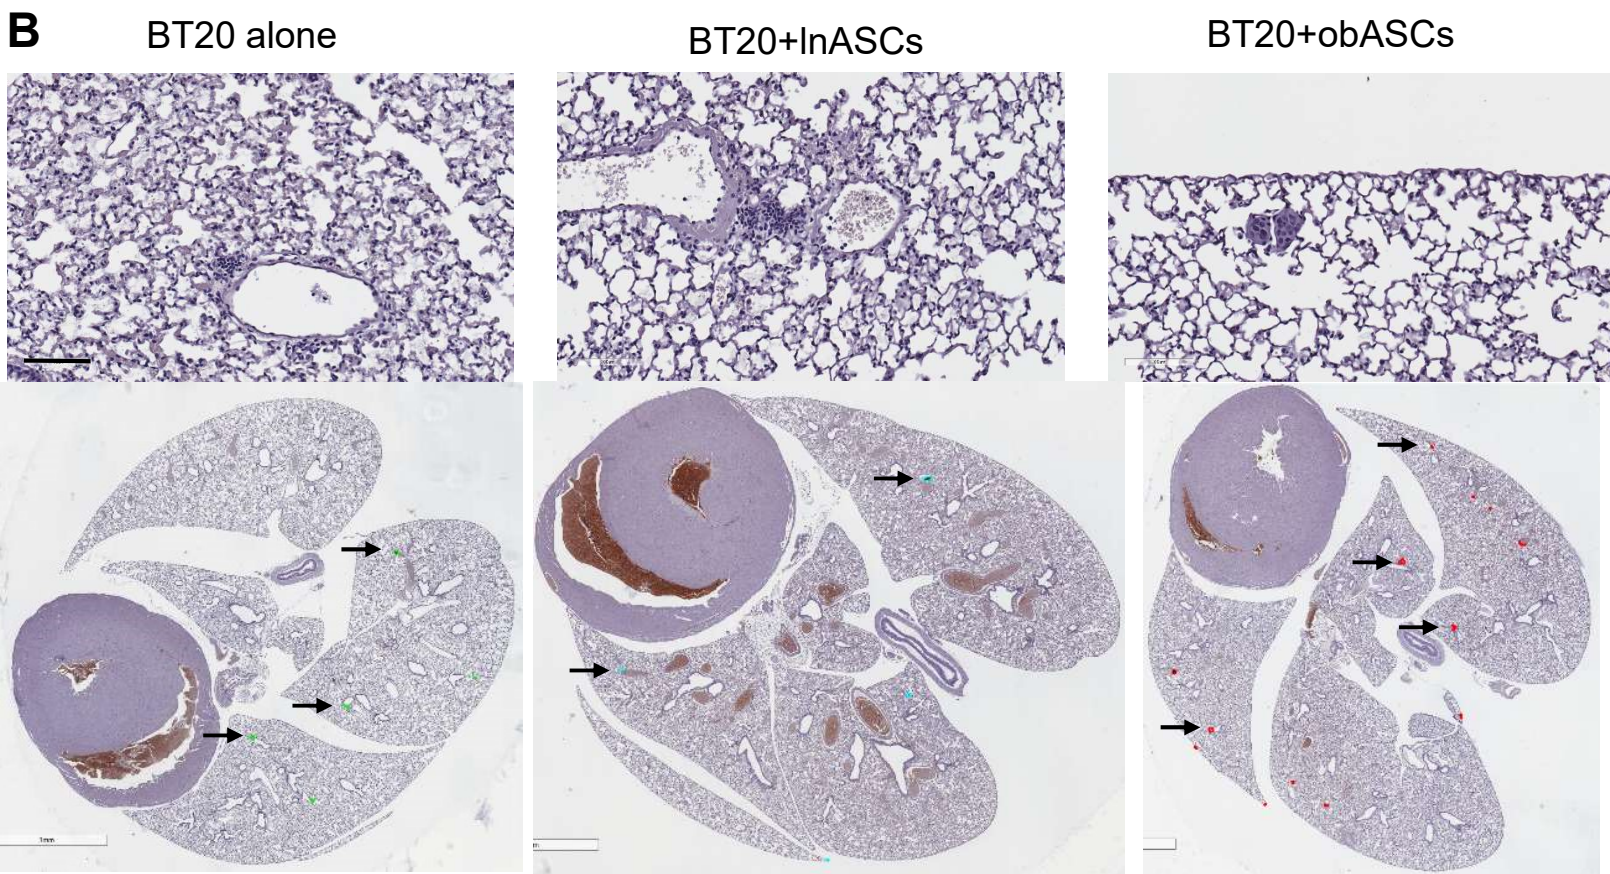

**Supplementary Figure 2**
