# Supplementary material for: Leptin produced by obesity-altered adipose stem cells promotes metastasis but not tumorigenesis of triple-negative breast cancer in orthotopic xenograft and patient-derived xenograft models
Source: PubMed Central journal article supplement (PMC6530039; doi:10.1186/s13058-019-1153-9), 2019-05-22
Supplement: 13058_2019_1153_MOESM3_ESM.pdf [file 13058_2019_1153_MOESM3_ESM.pdf]

**A**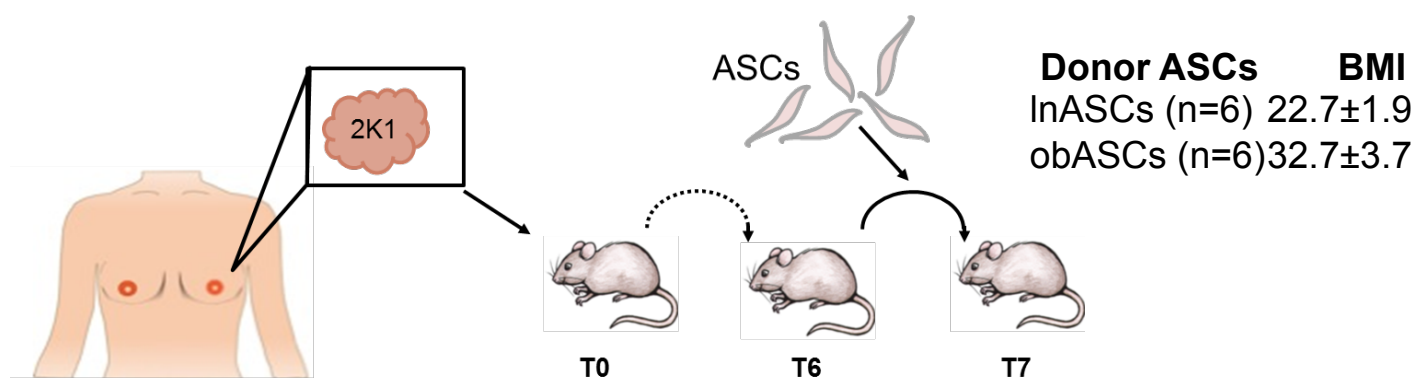

| PDX no. | Age | Race | PAM50 molecular subtype | Histologic type           | Ki67 | Lymph node involvement | Distant metastases |
|---------|-----|------|-------------------------|---------------------------|------|------------------------|--------------------|
| 2K1     | 59  | AA   | TNBC                    | Invasive ductal carcinoma | >99% | N                      | N                  |

**B**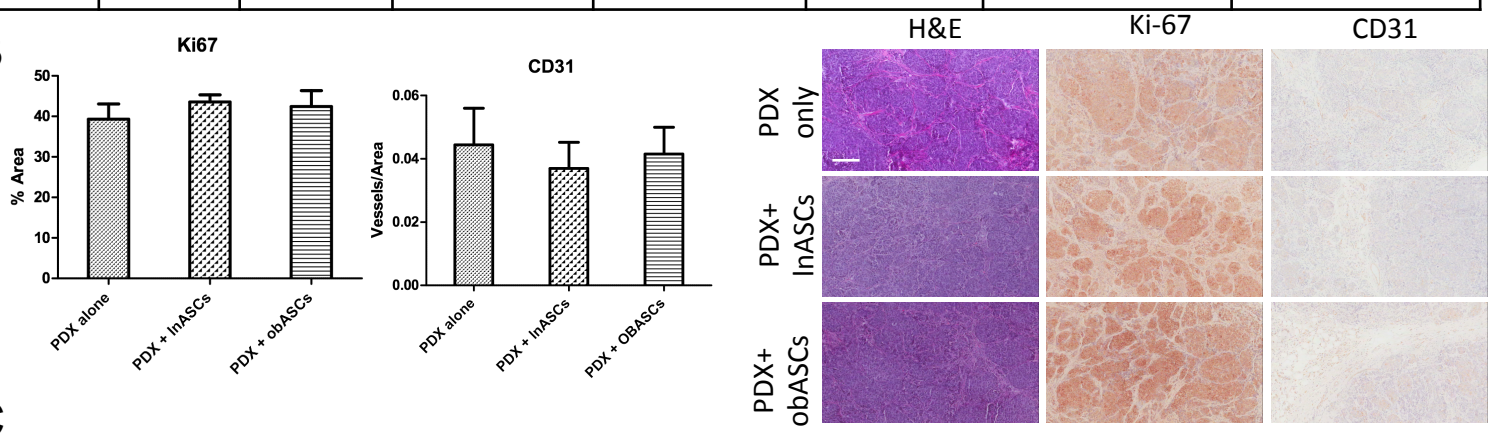**C**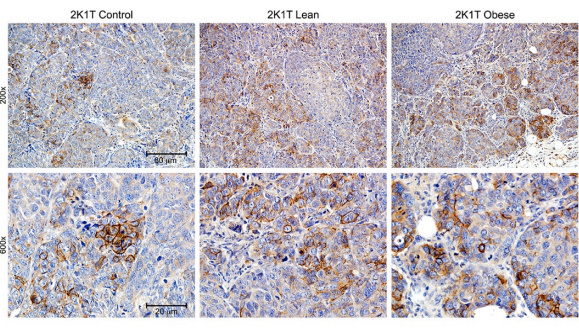**D**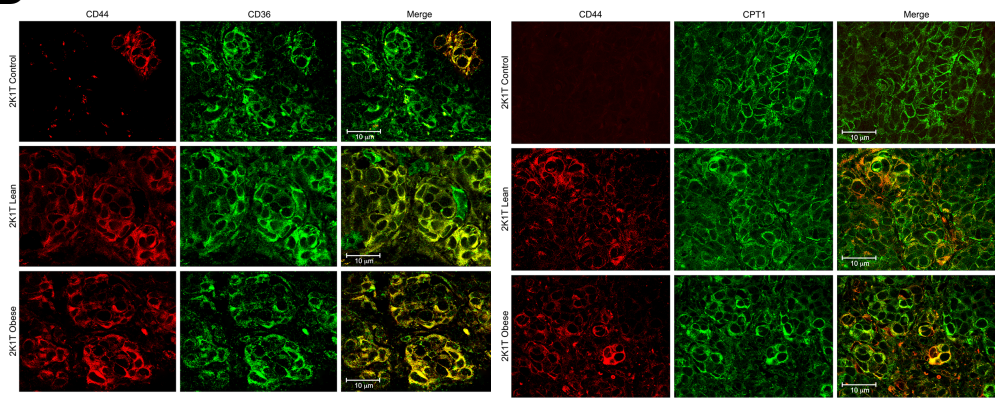**Supplemental Figure 3**
